# Supplementary material for: RANK-ligand (RANKL) expression in young breast cancer patients and during pregnancy
Source: PubMed Central journal article supplement (PMC4374174; doi:10.1186/s13058-015-0538-7), 2015-02-21

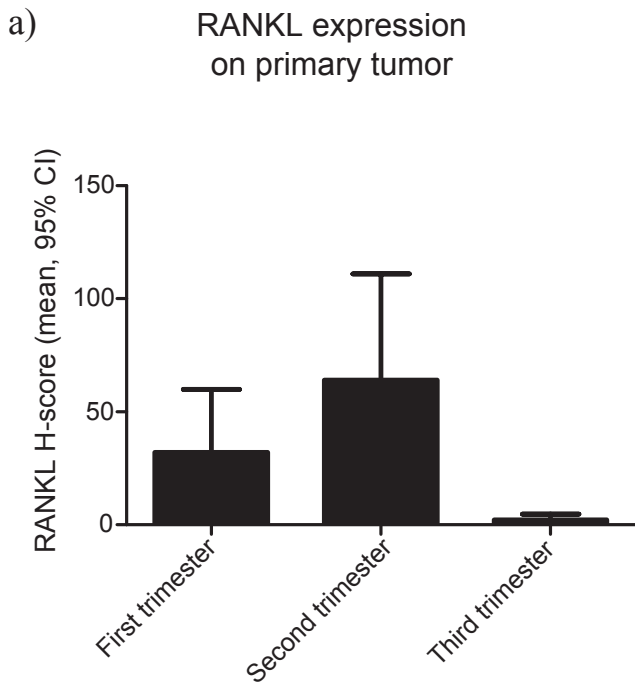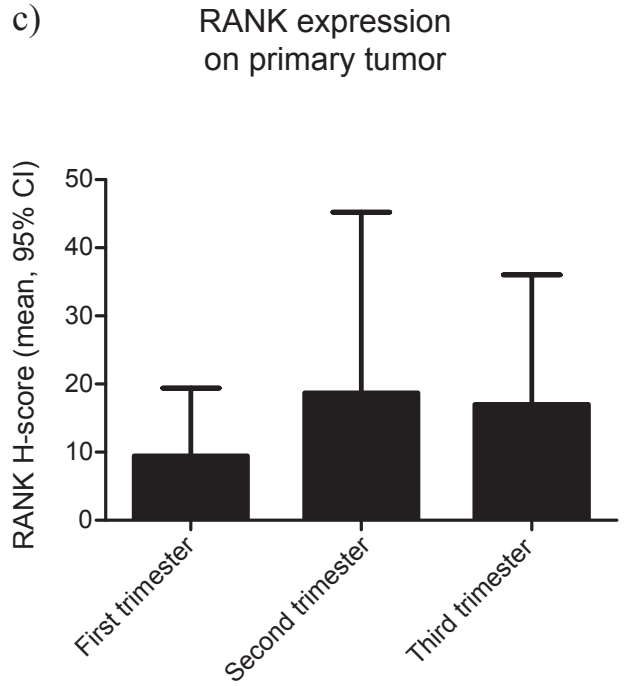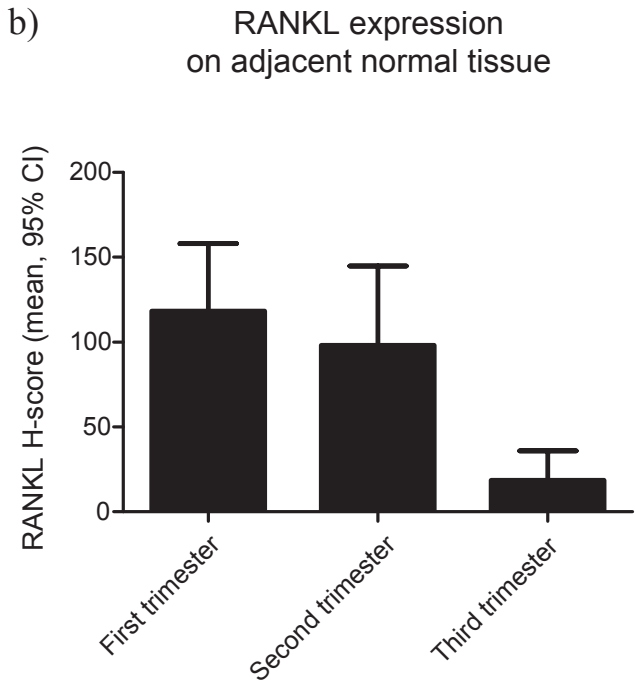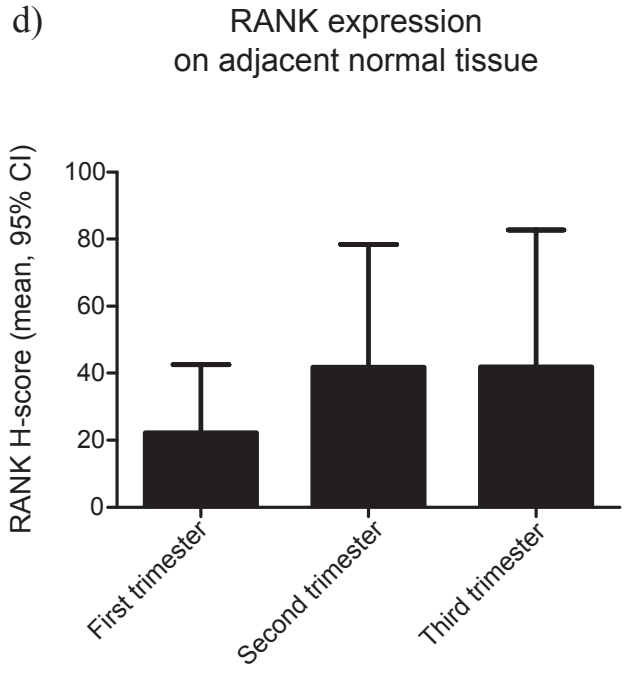

Supplement: 13058_2015_538_MOESM2_ESM.pdf [file 13058_2015_538_MOESM2_ESM.pdf]
