# Supplementary material for: RANK-ligand (RANKL) expression in young breast cancer patients and during pregnancy
Source: PubMed Central journal article supplement (PMC4374174; doi:10.1186/s13058-015-0538-7), 2015-02-21
Supplement: 13058_2015_538_MOESM5_ESM.pdf [file 13058_2015_538_MOESM5_ESM.pdf]

Supplemental Figure 5

a)

RANKL

$-\log_{10}(\text{FDR})$

0.0 0.5 1.0 1.5 2.0 2.5 3.0

positive regulation of smooth muscle cell migration  
 regulation of cellular component movement  
 regulation of smooth muscle cell migration  
 positive regulation of response to external stimulus  
 positive regulation of cellular component movement  
 regulation of cell migration  
 regulation of cell motility  
 regulation of response to external stimulus  
 positive regulation of cell migration  
 positive regulation of cell motility  
 regulation of locomotion  
 regulation of tissue remodeling  
 positive regulation of locomotion  
 regulation of bone resorption  
 regulation of bone remodeling  
 keratan sulfate biosynthetic process  
 keratan sulfate catabolic process  
 regulation of chemotaxis  
 keratan sulfate metabolic process  
 positive regulation of activated t cell proliferation  
 leukocyte homeostasis  
 bone resorption  
 positive regulation of epithelial cell proliferation  
 positive regulation of tissue remodeling  
 mammary gland development



b)

RANK

$-\log_{10}(\text{FDR})$

0 2 4

positive regulation of immune system process  
 positive regulation of immune response  
 cell cycle phase  
 regulation of immune response  
 regulation of lymphocyte activation  
 mitotic cell cycle  
 regulation of cell activation  
 regulation of leukocyte activation  
 regulation of leukocyte proliferation  
 inflammatory response  
 regulation of t cell activation  
 m phase of mitotic cell cycle  
 regulation of lymphocyte proliferation  
 response to biotic stimulus  
 m phase  
 regulation of mononuclear cell proliferation  
 immune response regulating signaling pathway  
 positive regulation of lymphocyte activation  
 leukocyte activation  
 response to wounding  
 lymphocyte activation  
 positive regulation of cell activation  
 positive regulation of t cell activation  
 positive regulation of leukocyte proliferation  
 positive regulation of leukocyte activation  
 immune response activating signal transduction  
 mitotic prometaphase  
 cell proliferation  
 positive regulation of lymphocyte proliferation  
 positive regulation of mononuclear cell proliferation  
 immune response regulating cell surface receptor signaling pathway
